# Supplementary material for: Androgen receptor suppresses lung cancer invasion and increases cisplatin response via decreasing TPD52 expression
Source: PubMed Central journal article supplement (PMC10411467; doi:10.7150/ijbs.84577), 2023-07-16

**Supplementary Table1. Primers used in Real time PCR**

| <b>Primer Name</b> | <b>Sequence (5'-3')</b>  |
|--------------------|--------------------------|
| hsa_circ_0008705 F | CATCAACCAGTTTGCAGCAG     |
| hsa_circ_0008705 R | GAGGCCATAGGGTACGACAA     |
| hsa_circ_0025583 F | TTGGGGCTCTGATTGATACA     |
| hsa_circ_0025583 R | TCCAGACACAAGGAAACCAA     |
| hsa_circ_0034693 F | TGAAGCTCATTTTAAGGAAATGG  |
| hsa_circ_0034693 R | TTTTCCAGGTTTGGATGACTC    |
| hsa-miR-1225-3p    | TGAGCCCCTGTGCCGCCCCCAG   |
| hsa-miR-1295       | TTAGGCCGCAGATCTGGGTGA    |
| hsa-miR-139-5p     | TCTACAGTGCACGTGTCTCCAGT  |
| hsa-miR-182        | TTTGGCAATGGTAGAACTCACACT |
| hsa-miR-31         | AGGCAAGATGCTGGCATAGCT    |
| hsa-miR-485-3p     | GTCATACACGGCTCTCCTCTCT   |
| hsa-miR-516b       | ATCTGGAGGTAAGAAGCACTTT   |
| hsa-miR-556-3p     | ATATTACCATTAGCTCATCTTT   |
| hsa-miR-570        | CGAAAACAGCAATTACCTTTGC   |
| hsa-miR-635        | ACTTGGGCACTGAAACAATGTCC  |
| hsa-miR-671-5p     | AGGAAGCCCTGGAGGGGCTGGAG  |
| hsa-miR-767-3p     | GGCATACCCCATGGTTTCT      |
| hsa-miR-875-5p     | TATACCTCAGTTTTATCAGGTG   |
| COL11A1 F          | ACCCTCGCATTGACCTTCC      |
| COL11A1 R          | TTTGTGCAAAATCCCGTTGTTT   |
| MAD2L1 F           | GTTCTTCTCATTTCGGCATCAACA |
| MAD2L1 R           | GAGTCCGATTTTCTGCACTCG    |
| TOP2A F            | ACCATTGCAGCCTGTAAATGA    |
| TOP2A R            | GGGCGGAGCAAAATATGTTCC    |
| TPD52 F            | AGCATCTAGCAGAGATCAAGCG   |
| TPD52 R            | AGCCAACAGACGAAAAAGCAG    |

1 **Supplementary Figure legend**

2 **Figure 1 A.** Chamber-transwell invasion assay was performed to assess the invasion capacity of  
3 A549 cells after overexpression of AR and circ-SLCO1B7 (oecirc-SLCO1B7). **B.** MTT assay was  
4 performed to measure the DDP response of A549 cells after overexpression of AR and circ-  
5 SLCO1B7 (oecirc-SLCO1B7). **C-D.** Conserved AR binding motif and three predicted AREs by  
6 JASPAR within the 2 kb 5'-promoter region of SLCO1B7. Significance levels are denoted as \*p <  
7 0.05, \*\*p < 0.01, and \*\*\*p < 0.001.

8 **Figure 2 A.** Chamber-transwell invasion assay was performed to assess the invasion capacity of  
9 H1299 cells transfected with shAR or oemiR-139-5p. **B.** MTT assays were conducted to detect  
10 the DDP response of H1299 cells transfected with shAR or oemiR-139-5p. **C.** Luciferase reporter  
11 assay was performed to confirm the direct binding between miR-139-5p and circ-SLCO1B7. **D.**  
12 The expression levels of circ-SLCO1B7, miR-139-5p, TPD52 in A549 cells treated with 1 nM and  
13 10 nM DHT. **E.** The expression levels of circ-SLCO1B7, miR-139-5p, TPD52 in H1229 cells  
14 treated with 10  $\mu$ M and 20  $\mu$ M enzalutamide. **F.** TPD52 stability with or without miR-139-5p. 5  $\mu$ M  
15 Actinomycin D was used in this assay. \*p < 0.05, \*\*p < 0.01, and \*\*\*p < 0.001.

16 **Figure 3 A.** Survival curve of TPD52 expression in lung cancer patients from the TCGA database.  
17 **B.** AR expression in TPD52-high and TPD52-low lung cancer samples. **C.** MiR-139-5p expression  
18 in TPD52-high and TPD52-low lung cancer samples. **D.** The expression of miR-139-5p in different  
19 metastatic stage of lung cancer. Significance levels are denoted as \*p < 0.05, \*\*p < 0.01, and \*\*\*p  
20 < 0.001.

21

# Supplementary Fig. 1

**A**

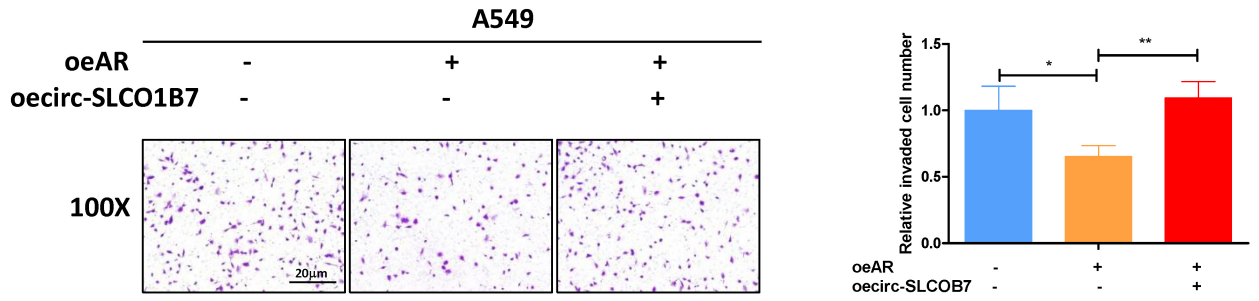

**B**

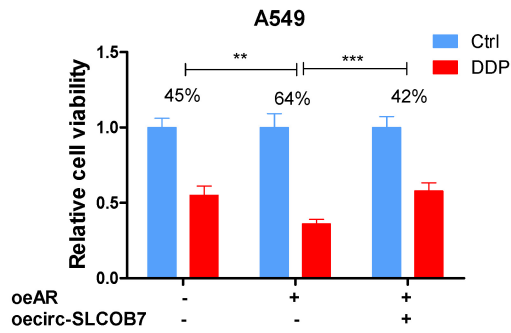

**C**

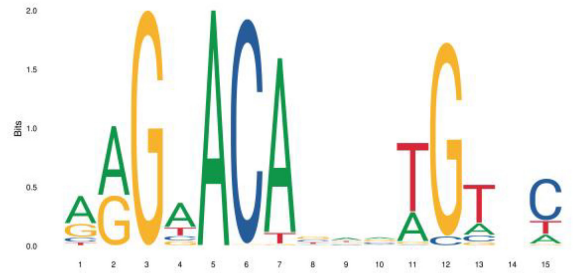

**D**

| Score     | Start | End  | Strand | Predicted sequence |
|-----------|-------|------|--------|--------------------|
| 13.047663 | 1472  | 1486 | -      | AAGCACACAAAGTGT    |
| 11.211198 | 1468  | 1482 | +      | GAGCACACTTTGTGT    |
| 9.930478  | 1043  | 1057 | -      | CAGGACATGCAGTTT    |

# Supplementary Fig. 2

**A**

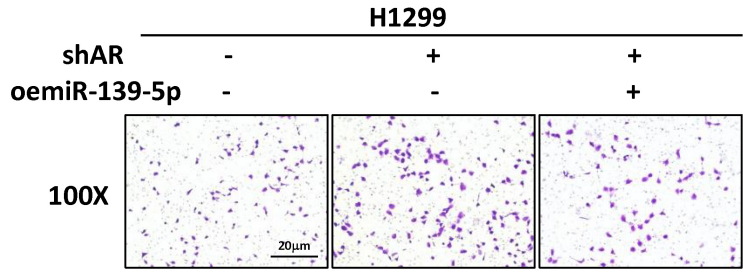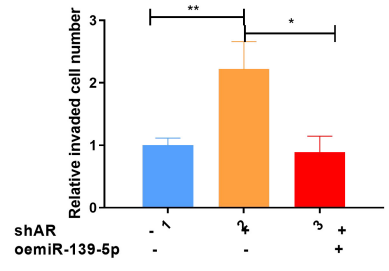

**B**

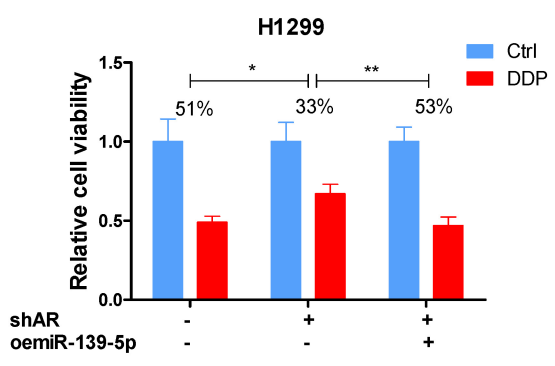

**C**

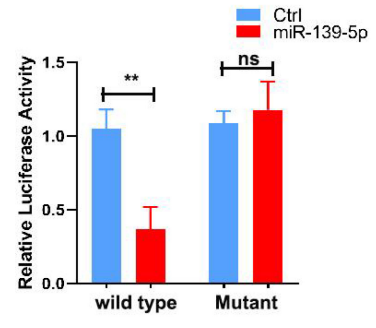

**D**

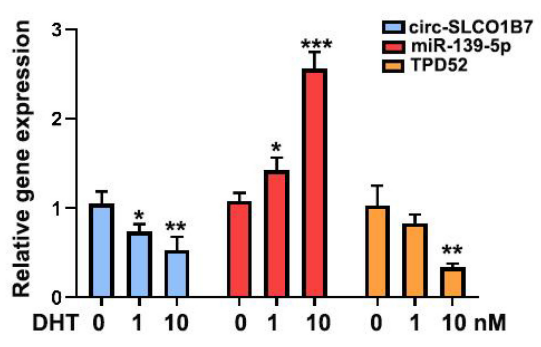

**E**

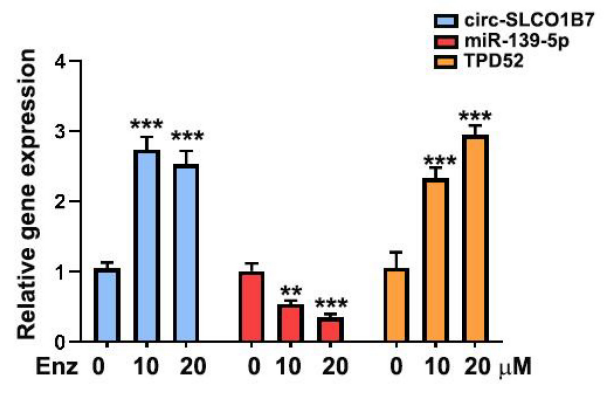

**F**

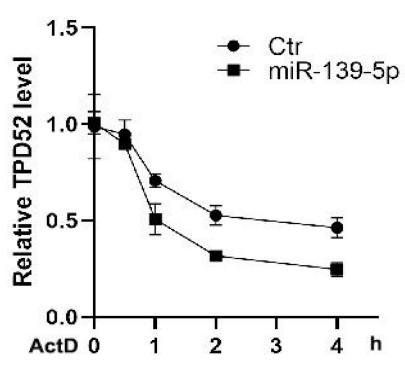

# Supplementary Fig. 3

A

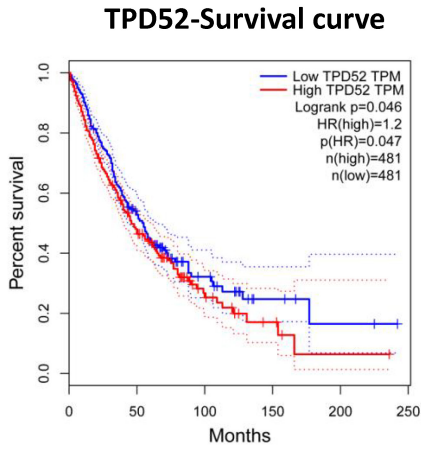

B

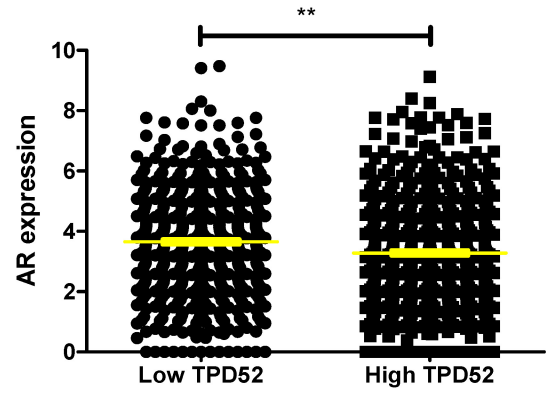

C

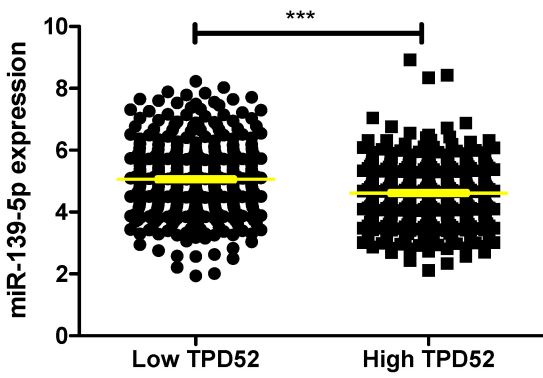

D

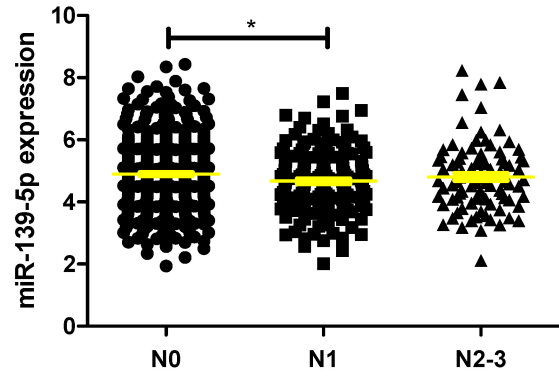

Supplement: ijbsv19p3709s1.pdf [file ijbsv19p3709s1.pdf]
